# Supplementary material for: Diluted exciplex concentrations in organic light emitting diodes for blue-shifted spectra and improved efficiency
Source: Royal Society of Chemistry journal article supplement (doi:10.1039/d1tc05029j), 2022-01-01
Supplement: d1tc05029j1.pdf [file d1tc05029j1.pdf]

Supporting Information

## **Diluted exciplex concentration in organic light emitting diodes for blue-shifted spectra and improved efficiency**

Jiakui Yan,<sup>a</sup> Bizheng Dong,<sup>a</sup> Yabo Xu,<sup>a</sup> Bo Zhao,<sup>a\*</sup> Fangming Jin,<sup>b\*</sup> Hua Wang,<sup>a,c</sup> Wenlian Li<sup>d</sup>

<sup>a</sup>Key Laboratory of Interface Science and Engineering in Advanced Materials of Ministry of Education, Taiyuan University of Technology, Taiyuan, 030024, PR China

<sup>b</sup>School of Electrical Engineering, Anhui Polytechnic University, Wuhu, 241000, PR China

<sup>c</sup>College of Textile Engineering, Taiyuan University of Technology, Taiyuan 030024, PR China

<sup>d</sup>State Key Laboratory of Luminescence and Applications, Changchun Institute of Optics, Fine Mechanics and Physics, Chinese Academy of Sciences, Changchun, 130033, PR China

**Corresponding author:**

**E-mail address:** zhaobo01@tyut.edu.cn (B. Zhao); jinfangming@126.com (F. M. Jin)

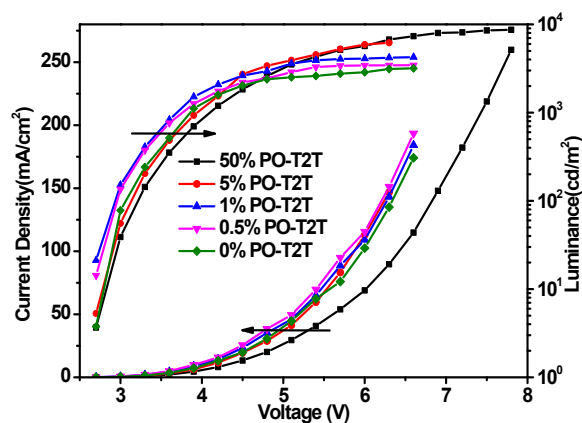

Figure S1 The current density-voltage-luminance (J-V-L) curves with different concentrations PO-T2T with the structure of ITO/ MoO<sub>3</sub> (3 nm)/ NPB (30 nm)/ TCTA (10 nm)/ DMAC-DPS: x% PO-T2T (25 nm)/ TPBi (45 nm)/LiF (1 nm)/Al (100 nm), x=50, 5, 1, 0.5 and 0.

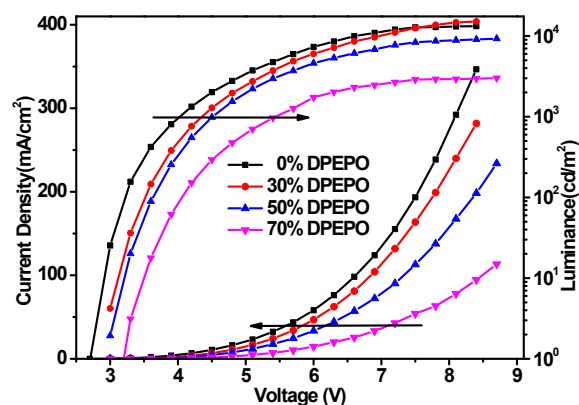

Figure S2 The J-V-L curves with different concentrations DPEPO with the structure of ITO/ MoO<sub>3</sub> (3 nm)/ NPB (30 nm)/ TCTA (10 nm)/ DMAC-DPS: PO-T2T (1:1): x% DPEPO (25 nm)/ TPBi (45 nm)/LiF (1 nm)/Al (100 nm), x=0, 30, 50 and 70.

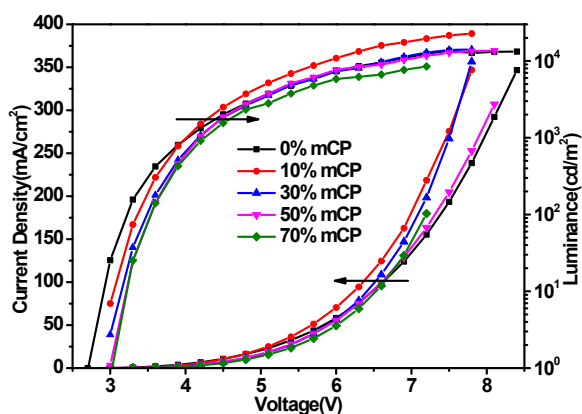

Figure S3 The J-V-L curves with different concentrations mCP with the structure of ITO/ MoO<sub>3</sub> (3 nm)/ NPB (30 nm)/ TCTA (10 nm)/ DMAC-DPS: PO-T2T (1:1): x% mCP (25 nm)/ TPBi (45 nm)/LiF (1 nm)/Al (100 nm), x=0, 10, 30, 50 and 70.
